# Supplementary material for: Trivalent lanthanide lacunary phosphomolybdate complexes: a structural and spectroscopic study across the series [Ln(PMo11O39)2]11?
Source: Royal Society of Chemistry journal article supplement (doi:10.1039/b500408j), 2005-01-01

## Supporting Data

### Variable temperature $^{31}\text{P}$ NMR study of the $[\text{Yb}^{\text{III}}(\text{PW}_{11}\text{O}_{39})_2]^{11-}$ complex.

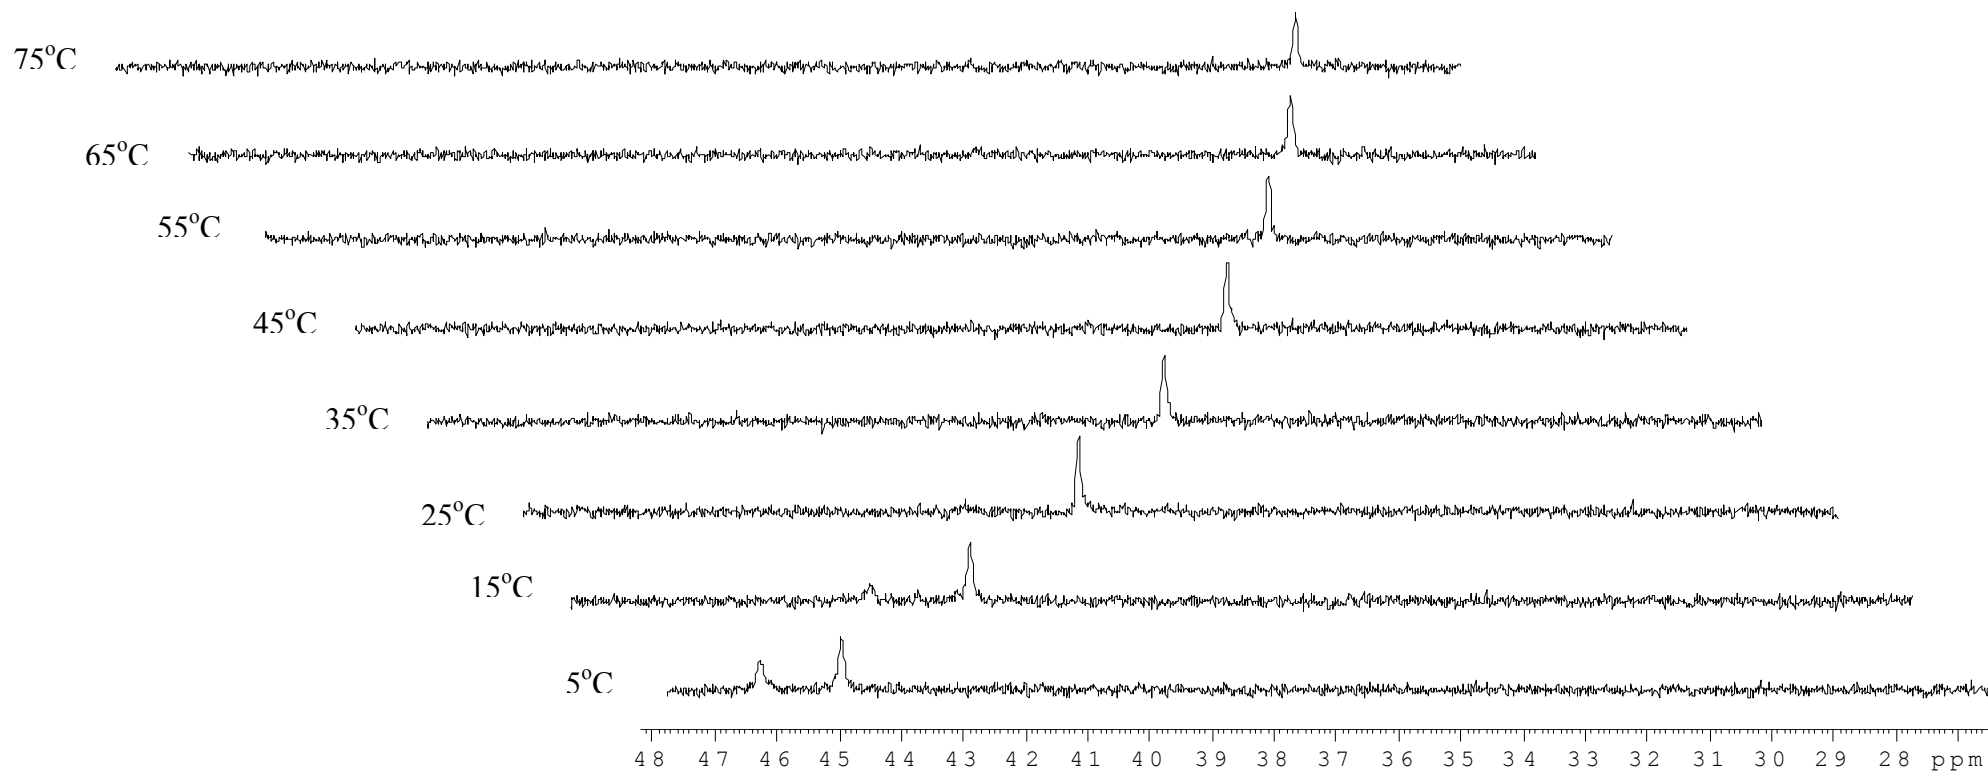

$$y = 77.6 - 48.1x + 10.9x^2$$

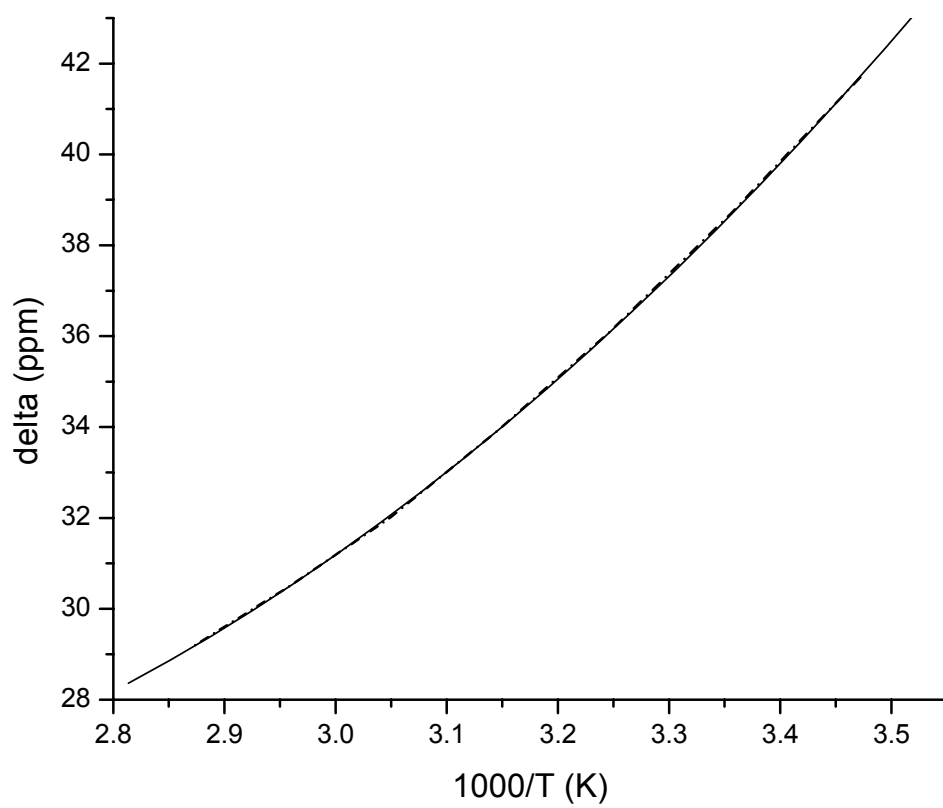

Supplement: b500408j.pdf [file b500408j.pdf]
